# Supplementary material for: A one-step fabrication of soft-magnetic high entropy alloy fiber with excellent strength and flexibility
Source: PubMed Central journal article supplement — Nat Commun. 2024 Dec 4;15:10549. doi: 10.1038/s41467-024-54984-7 (PMC11618367; doi:10.1038/s41467-024-54984-7), 2024-12-04
Supplement: 41467_2024_54984_MOESM3_ESM.pdf [file 41467_2024_54984_MOESM3_ESM.pdf]

## **Description of Additional Supplementary Files**

File Name: Supplementary Movie 1

Description: The in-situ tensile deformation process of as-spun samples. Surface morphology and slip traces could be observed.

File Name: Supplementary Movie 2

Description: LTEM video of domain walls motion with magnetic field in as-spun samples. Domain walls pinned at the boundary of the Ta-rich phase.

File Name: Supplementary Movie 3

Description: LTEM video of domain walls motion with magnetic field in 800 °C-120 min annealed samples. Smooth motion of magnetic domain walls could be observed.
